# Supplementary material for: Alkbh8 Regulates Selenocysteine-Protein Expression to Protect against Reactive Oxygen Species Damage
Source: PubMed Central journal article supplement (PMC4492958; doi:10.1371/journal.pone.0131335), 2015-07-06
Supplement: pone.0131335.s001.pdf [file pone.0131335.s001.pdf]

**Table S1. Transcripts Differentially Regulated in Alkbh8<sup>-/-</sup> MEFs Relative to WT**

| Transcripts Cluster Id | [KO](norm alized) | [WT](norm alized) | p-value  | regulation | FC KO/WT | genesymbol              | genbank           | gene description                                                                                                                     |
|------------------------|-------------------|-------------------|----------|------------|----------|-------------------------|-------------------|--------------------------------------------------------------------------------------------------------------------------------------|
| 10496359               | 7.90              | 9.42              | 0.01234  | down       | -2.88    | Emcn                    | BC003706          | endomucin                                                                                                                            |
| 10498441               | 7.43              | 8.89              | 0.00776  | down       | -2.75    | Gpr149                  | BC119599          | G protein-coupled receptor 149                                                                                                       |
| 10576581               | 7.89              | 9.30              | 0.00947  | down       | -2.66    | Kcnk1                   | AF033017          | potassium channel, subfamily K, member 1 acid phosphatase 1, soluble   similar to acid phosphatase 1, soluble                        |
| 10399820               | 9.07              | 10.39             | 0.0126   | down       | -2.49    | Acp1                    | BC112413          | phosphatase 1, soluble                                                                                                               |
| 10437055               | 7.28              | 8.40              | 0.00339  | down       | -2.17    | Sim2                    | D64135            | single-minded homolog 2 (Drosophila)                                                                                                 |
| 10533246               | 7.53              | 8.63              | 0.00316  | down       | -2.15    | Oas1a                   | BC043339 BC013715 | 2'-5' oligoadenylate synthetase 1G   2'-5' oligoadenylate synthetase 1A                                                              |
| 10603573               | 7.08              | 8.09              | 0.00656  | down       | -2.01    | Syt15                   | AB098160          | synaptotagmin-like 5                                                                                                                 |
| 10438791               | 8.30              | 9.29              | 0.00217  | down       | -1.99    | Uts2d                   | AY321315          | urotensin 2 domain containing                                                                                                        |
| 10582925               | 8.32              | 9.26              | 6.31E-04 | down       | -1.92    | Alkbh8                  | BC050863          | alkB, alkylation repair homolog 8 (E. coli)                                                                                          |
| 10500938               | 7.77              | 8.70              | 0.00739  | down       | -1.91    | Wnt2b                   | BC119276          | wingless related MMTV integration site 2b                                                                                            |
| 10462390               | 7.16              | 8.03              | 0.00324  | down       | -1.83    | Cd274                   | BC066841          | CD274 antigen                                                                                                                        |
| 10399725               | 10.86             | 11.65             | 8.90E-04 | down       | -1.73    | Sox11                   | AF009414          | SRY-box containing gene 11                                                                                                           |
| 10399586               | 9.71              | 10.48             | 0.00168  | down       | -1.71    | ZT2                     | AJ005350          | zinc finger protein 125                                                                                                              |
| 10427303               | 9.64              | 10.40             | 0.0037   | down       | -1.70    | Hoxc4                   | X69019            | homeo box C4                                                                                                                         |
| 10411226               | 10.01             | 10.72             | 0.01535  | down       | -1.64    | F2r1                    | BC025432          | coagulation factor II (thrombin) receptor-like 1                                                                                     |
| 10380622               | 10.37             | 11.06             | 0.01543  | down       | -1.62    | Hoxb9                   | BC100743          | homeo box B9                                                                                                                         |
| 10502451               | 8.47              | 9.16              | 0.00334  | down       | -1.61    | Bmpr1b                  | BC065143          | bone morphogenetic protein receptor, type 1B                                                                                         |
| 10414805               | 7.51              | 8.19              | 0.01512  | down       | -1.61    | Tcra Tcr alpha Tcralpha | AK131826          | T cell receptor alpha variable 13D-4                                                                                                 |
| 10356475               | 9.76              | 10.45             | 0.00527  | down       | -1.61    | Arl4c                   | BC055769          | ADP-ribosylation factor-like 4C                                                                                                      |
| 10431915               | 10.10             | 10.77             | 0.0021   | down       | -1.58    | Slc38a4                 | AY027919          | solute carrier family 38, member 4                                                                                                   |
| 10461152               | 10.34             | 10.98             | 0.00359  | down       | -1.56    | Snhg1                   | AK051045          | small nucleolar RNA host gene (non-protein coding) 1                                                                                 |
| 10435075               | 10.18             | 10.81             | 1.39E-04 | down       | -1.55    | Tfrc                    | BC054522          | transferrin receptor                                                                                                                 |
| 10427290               | 9.22              | 9.82              | 0.00304  | down       | -1.52    | Hoxc8                   | X07646            | homeo box C8                                                                                                                         |
| 10384985               | 9.63              | 9.04              | 0.00848  | up         | 1.50     | Rhbd1                   | BC027346          | rhomboid family 1 (Drosophila)                                                                                                       |
| 10358339               | 7.80              | 7.21              | 1.84E-04 | up         | 1.50     | Cfh                     | M12660            | complement component factor h                                                                                                        |
| 10405343               | 9.44              | 8.84              | 0.0087   | up         | 1.51     | Tspan17                 | BC010346          | tetraspanin 17                                                                                                                       |
| 10598833               | 7.52              | 6.92              | 6.95E-04 | up         | 1.52     | Chst7                   | BC019204          | carbohydrate (N-acetylglucosamino) sulfotransferase 7                                                                                |
| 10464425               | 8.74              | 8.13              | 0.0062   | up         | 1.52     | Grk5                    | AF040746          | G protein-coupled receptor kinase 5                                                                                                  |
| 10463844               | 9.30              | 8.69              | 0.01589  | up         | 1.52     | Gsto2                   | BC030371          | glutathione S-transferase omega 2                                                                                                    |
| 10498576               | 12.52             | 11.91             | 8.09E-04 | up         | 1.53     | Lxn                     | D88769            | latexin                                                                                                                              |
| 10381445               | 8.88              | 8.27              | 0.00401  | up         | 1.53     | Tmem106a                | BC022145          | transmembrane protein 106A                                                                                                           |
| 10399005               | 11.08             | 10.47             | 0.00643  | up         | 1.53     | Crip1                   | BC031922          | cysteine-rich protein 1 (intestinal)                                                                                                 |
| 10541496               | 11.78             | 11.16             | 0.01351  | up         | 1.53     | Mfp5                    | AF180805          | microfibrillar associated protein 5                                                                                                  |
| 10595979               | 11.29             | 10.68             | 0.00833  | up         | 1.53     | Mras                    | AK050469          | muscle and microspikes RAS                                                                                                           |
| 10526459               | 8.64              | 8.01              | 0.00401  | up         | 1.54     | Rasa4                   | BC049381          | RAS p21 protein activator 4                                                                                                          |
| 10373740               | 9.10              | 8.48              | 0.00805  | up         | 1.54     | Pik3ip1                 | AY522649          | phosphoinositide-3-kinase interacting protein 1                                                                                      |
| 10501199               | 8.86              | 8.23              | 0.0029   | up         | 1.55     | Gstm7                   | BC051924          | glutathione S-transferase, mu 7                                                                                                      |
| 10414360               | 12.17             | 11.53             | 0.01022  | up         | 1.55     | Lgals3                  | BC132328          | lectin, galactose binding, soluble 3                                                                                                 |
| 10432918               | 8.34              | 7.71              | 0.00563  | up         | 1.55     | Krt8                    | M21836            | keratin 8                                                                                                                            |
| 10372781               | 8.16              | 7.53              | 0.00582  | up         | 1.55     | Irak3                   | BC120829          | interleukin-1 receptor-associated kinase 3                                                                                           |
| 10513208               | 10.35             | 9.72              | 0.01476  | up         | 1.55     | Svep1                   | AF206329          | sushi, von Willebrand factor type A, EGF and pentraxin domain containing 1                                                           |
| 10475437               | 8.40              | 7.75              | 0.01456  | up         | 1.56     | Sord                    | BC092291          | sorbitol dehydrogenase                                                                                                               |
| 10546891               | 9.55              | 8.91              | 0.00801  | up         | 1.57     | Camk1                   | BC014825          | calcium/calmodulin-dependent protein kinase I                                                                                        |
| 10580537               | 8.80              | 8.14              | 0.01422  | up         | 1.58     | Aktip                   | BC008130          | thymoma viral proto-oncogene 1 interacting protein                                                                                   |
| 10537227               | 8.95              | 8.28              | 9.99E-04 | up         | 1.58     | Tmem140                 | BC023802          | transmembrane protein 140                                                                                                            |
| 10470529               | 9.13              | 8.47              | 0.00611  | up         | 1.58     | Olfm1                   | D78262            | olfactomedin 1                                                                                                                       |
| 10599654               | 9.62              | 8.96              | 0.01478  | up         | 1.59     | Cxx1c                   | BC031701          | CAAX box 1 homolog C (human)                                                                                                         |
| 10454254               | 8.87              | 8.20              | 2.39E-05 | up         | 1.60     | Dtna                    | BC040364          | dystrobrevin alpha                                                                                                                   |
| 10346374               | 7.94              | 7.26              | 0.01594  | up         | 1.60     | Aox1                    | AB017482          | aldehyde oxidase 1                                                                                                                   |
| 10371607               | 8.89              | 8.21              | 0.00906  | up         | 1.60     | Dram1                   | BC021433          | RIKEN cDNA 1200002N14 gene                                                                                                           |
| 10504417               | 8.79              | 8.11              | 0.01101  | up         | 1.60     | Hrct1                   | AK014425          | RIKEN cDNA 3830408D24 gene                                                                                                           |
| 10584653               | 8.17              | 7.49              | 0.00122  | up         | 1.60     | CTRP5 Mfrp              | AF469650          | C1q and tumor necrosis factor related protein 5   membrane-type frizzled-related protein                                             |
| 10554819               | 7.32              | 6.63              | 0.01381  | up         | 1.61     | Me3                     | BC099935          | malic enzyme 3, NADP(+)-dependent, mitochondrial                                                                                     |
| 10457071               | 11.26             | 10.57             | 0.0011   | up         | 1.61     | Cyb5                    | BC024341          | cytochrome b-5                                                                                                                       |
| 10370000               | 7.58              | 6.89              | 0.01066  | up         | 1.61     | Gstt1                   | BC012254          | glutathione S-transferase, theta 1                                                                                                   |
| 10470959               | 9.48              | 8.79              | 0.01178  | up         | 1.62     | Phyh1 Lrrc8a            | BC039982 BC048152 | phytanoyl-CoA dioxygenase domain containing 1   leucine rich repeat containing 8A                                                    |
| 10538802               | 7.22              | 6.53              | 2.18E-04 | up         | 1.62     | A930038C07Rik           | BC047154          | RIKEN cDNA A930038C07 gene                                                                                                           |
| 10420631               | 10.42             | 9.73              | 0.00102  | up         | 1.62     | Ebpl                    | BC027422          | emopamil binding protein-like                                                                                                        |
| 10407955               | 9.25              | 8.55              | 0.00968  | up         | 1.62     | Épdr1                   | BC014708          | ependymin related protein 1 (zebrafish)                                                                                              |
| 10429573               | 11.85             | 11.15             | 0.00105  | up         | 1.63     | Ly6c                    | BC010764 D86232   | lymphocyte antigen 6 complex, locus C1   lymphocyte antigen 6 complex, locus C2   similar to Lymphocyte antigen 6C precursor (Ly-6C) |
| 10595981               | 10.00             | 9.30              | 0.00137  | up         | 1.63     | Mras                    | AB004879          | muscle and microspikes RAS                                                                                                           |
| 10442643               | 8.90              | 8.19              | 0.01104  | up         | 1.63     | Nme3                    | BC028503          | non-metastatic cells 3, protein expressed in                                                                                         |
| 10352314               | 7.53              | 6.82              | 0.01464  | up         | 1.63     | Lefty1                  | BC050221          | left right determination factor 1                                                                                                    |
| 10504763               | 8.33              | 7.62              | 0.00388  | up         | 1.64     | Galnt12                 | BC056425          | UDP-N-acetyl-alpha-D-galactosamine:polypeptide N-acetylgalactosaminyltransferase 12                                                  |
| 10596747               | 8.65              | 7.92              | 1.52E-04 | up         | 1.66     | Sema3f                  | BC010976          | sema domain, immunoglobulin domain (Ig), short basic domain, secreted, (semaphorin) 3F                                               |
| 10587639               | 7.76              | 7.02              | 0.00916  | up         | 1.67     | Nt5e                    | BC119268          | 5' nucleotidase, ecto                                                                                                                |
| 10412298               | 8.85              | 8.11              | 0.00456  | up         | 1.67     | Itga1                   | BC167237          | integrin alpha 1                                                                                                                     |
| 10497253               | 7.90              | 7.15              | 0.00499  | up         | 1.67     | Pmp2                    | BC099520          | peripheral myelin protein 2                                                                                                          |
| 10392815               | 7.94              | 7.20              | 0.00159  | up         | 1.67     | AF251705 Cd300a         | AF251705 AF251704 | cDNA sequence AF251705   CD300A antigen                                                                                              |

|          |       |       |          |    |      |                           |                   |                                                                                                                                      |
|----------|-------|-------|----------|----|------|---------------------------|-------------------|--------------------------------------------------------------------------------------------------------------------------------------|
| 10362538 | 11.09 | 10.35 | 0.0066   | up | 1.68 | Lama4                     | U59865            | laminin, alpha 4                                                                                                                     |
| 10551966 | 10.77 | 10.01 | 9.77E-04 | up | 1.70 | Hspb6                     | BC089621          | heat shock protein, alpha-crystallin-related, B6                                                                                     |
| 10358476 | 7.92  | 7.15  | 0.00752  | up | 1.71 | Prg4                      | AB034730          | proteoglycan 4 (megakaryocyte stimulating factor, articular superficial zone protein)                                                |
| 10437210 | 8.55  | 7.78  | 0.00755  | up | 1.71 | Bace2                     | BC120773          | beta-site APP-cleaving enzyme 2                                                                                                      |
| 10571860 | 9.20  | 8.43  | 1.68E-04 | up | 1.72 | Hand2                     | AK035160          | heart and neural crest derivatives expressed transcript 2                                                                            |
| 10407350 | 10.27 | 9.49  | 0.00476  | up | 1.72 | Fgf10                     | BC048229          | fibroblast growth factor 10                                                                                                          |
| 10427125 | 10.88 | 10.09 | 0.00682  | up | 1.73 | Igfbp6                    | BC012723          | insulin-like growth factor binding protein 6                                                                                         |
| 10365974 | 11.52 | 10.72 | 0.00767  | up | 1.74 | Dcn                       | BC132521          | decorin                                                                                                                              |
| 10458828 | 10.77 | 9.97  | 0.01321  | up | 1.74 | Cdo1                      | BC013638          | cysteine dioxygenase 1, cytosolic                                                                                                    |
| 10410766 | 8.69  | 7.89  | 0.01382  | up | 1.74 | Nr2f1                     | BC108408          | nuclear receptor subfamily 2, group F, member 1                                                                                      |
| 10349773 | 9.75  | 8.94  | 0.00456  | up | 1.75 | Klhdc8a                   | BC011135          | kelch domain containing 8A                                                                                                           |
| 10436666 | 9.31  | 8.49  | 0.00976  | up | 1.76 | Jam2                      | BC028778          | junction adhesion molecule 2                                                                                                         |
| 10544875 | 10.64 | 9.82  | 0.00188  | up | 1.76 | Scrn1                     | AK129084          | secernin 1                                                                                                                           |
| 10471067 | 11.59 | 10.78 | 0.00836  | up | 1.76 | Prrx2                     | AK019971          | paired related homeobox 2                                                                                                            |
| 10429568 | 11.72 | 10.90 | 4.15E-04 | up | 1.77 | NM_010741                 | BC010764 M18466   | lymphocyte antigen 6 complex, locus C1   lymphocyte antigen 6 complex, locus C2   similar to Lymphocyte antigen 6C precursor (Ly-6C) |
| 10395849 | 7.62  | 6.80  | 0.00582  | up | 1.77 | Pax9                      | BC005794          | paired box gene 9                                                                                                                    |
| 10399680 | 8.09  | 7.26  | 0.01509  | up | 1.77 | Cys1                      | AF390548          | cystin 1                                                                                                                             |
| 10510129 | 11.32 | 10.50 | 0.00462  | up | 1.77 | Dhrs3                     | BC010972          | dehydrogenase/reductase (SDR family) member 3                                                                                        |
| 10499132 | 10.21 | 9.38  | 0.00841  | up | 1.78 | Mab21l2                   | AF126427          | mab-21-like 2 (C. elegans)                                                                                                           |
| 10502805 | 8.22  | 7.38  | 6.41E-04 | up | 1.79 | Ptgr                      | D17433            | prostaglandin F receptor                                                                                                             |
| 10370259 | 8.71  | 7.86  | 0.00304  | up | 1.79 | Col18a1                   | BC064817          | collagen, type XVIII, alpha 1                                                                                                        |
| 10365983 | 8.58  | 7.74  | 0.00905  | up | 1.79 | Lum                       | BC005550          | lumican                                                                                                                              |
| 10563085 | 9.99  | 9.14  | 0.00144  | up | 1.80 | Fcgrt                     | BC003786 AK179452 | Fc receptor, IgG, alpha chain transporter                                                                                            |
| 10590073 | 7.26  | 6.40  | 0.01516  | up | 1.80 | Vill                      | AJ344341          | villin-like                                                                                                                          |
| 10382228 | 8.07  | 7.20  | 0.00894  | up | 1.82 | Axin2                     | BC057338          | axin2                                                                                                                                |
| 10601848 | 10.69 | 9.82  | 0.00723  | up | 1.83 | 6530401D17Rik             | BC016270          | RIKEN cDNA 6530401D17 gene                                                                                                           |
| 10505008 | 8.57  | 7.69  | 0.00753  | up | 1.84 | Slc44a1                   | AY249865          | solute carrier family 44, member 1                                                                                                   |
| 10349174 | 8.70  | 7.81  | 0.00716  | up | 1.85 | Serpib8                   | BC025121          | serine (or cysteine) peptidase inhibitor, clade B, member 8                                                                          |
| 10492355 | 8.30  | 7.41  | 0.01218  | up | 1.86 | Mme                       | BC034092          | membrane metallo endopeptidase                                                                                                       |
| 10557058 | 9.79  | 8.89  | 0.00823  | up | 1.87 | Polr3e                    | AK005034          | polymerase (RNA) III (DNA directed) polypeptide E                                                                                    |
| 10493798 | 10.97 | 10.06 | 1.02E-04 | up | 1.87 | S100a16                   | BC020031          | S100 calcium binding protein A16                                                                                                     |
| 10513061 | 9.80  | 8.90  | 8.98E-04 | up | 1.87 | Ctnn1                     | BC050070          | catenin (cadherin associated protein), alpha-like 1                                                                                  |
| 10380571 | 8.17  | 7.26  | 0.01195  | up | 1.87 | Gngt2                     | BC061005          | guanine nucleotide binding protein (G protein), gamma transducing activity polypeptide 2                                             |
| 10408557 | 9.23  | 8.33  | 0.00177  | up | 1.88 | Serpib1a                  | BC104333          | serine (or cysteine) peptidase inhibitor, clade B, member 1a                                                                         |
| 10518967 | 9.70  | 8.79  | 6.39E-04 | up | 1.88 | 1190007F08Rik             | BC099522 BC055936 | RIKEN cDNA 1190007F08 gene                                                                                                           |
| 10490551 | 9.66  | 8.74  | 0.01333  | up | 1.89 | Nkain4                    | BC089330          | Na+/K+ transporting ATPase interacting 4                                                                                             |
| 10474129 | 7.36  | 6.44  | 0.01315  | up | 1.89 | Pamr1                     | BC031841          | RIKEN cDNA E430002G05 gene                                                                                                           |
| 10585794 | 8.00  | 7.07  | 0.0075   | up | 1.90 | Cyp11a1                   | AF195119          | cytochrome P450, family 11, subfamily a, polypeptide 1                                                                               |
| 10490384 | 8.82  | 7.89  | 0.00375  | up | 1.90 | Lama5                     | U37501            | laminin, alpha 5                                                                                                                     |
| 10563597 | 7.16  | 6.24  | 0.01009  | up | 1.90 | Saa3                      | BC055885          | serum amyloid A 3                                                                                                                    |
| 10421258 | 9.24  | 8.30  | 0.00297  | up | 1.92 | Pdlim2                    | BC024556          | PDZ and LIM domain 2                                                                                                                 |
| 10540523 | 8.14  | 7.19  | 1.18E-04 | up | 1.93 | Lmcd1                     | BC019124          | LIM and cysteine-rich domains 1                                                                                                      |
| 10496438 | 9.42  | 8.46  | 0.006    | up | 1.93 | Adh1                      | BC013477          | alcohol dehydrogenase 1 (class I)                                                                                                    |
| 10492169 | 8.68  | 7.73  | 0.0078   | up | 1.94 | Mab21l1                   | AF228913          | mab-21-like 1 (C. elegans)                                                                                                           |
| 10463716 | 8.88  | 7.92  | 0.0056   | up | 1.94 | Cnnm2                     | AF216961          | cyclin M2                                                                                                                            |
| 10452648 | 9.41  | 8.44  | 0.00108  | up | 1.97 | Emilin2                   | BC053753          | elastin microfibril interfacier 2                                                                                                    |
| 10399465 | 9.18  | 8.18  | 4.03E-04 | up | 1.99 | 4a 4731402F03Rik 2310003N | BC005488          |                                                                                                                                      |
| 10523120 | 7.93  | 6.94  | 0.00651  | up | 2.00 | Cxcl5                     | BC024392          | chemokine (C-X-C motif) ligand 5                                                                                                     |
| 10478415 | 10.43 | 9.41  | 0.01126  | up | 2.03 | Wisp2                     | BC032877          | WNT1 inducible signaling pathway protein 2                                                                                           |
| 10571567 | 9.46  | 8.44  | 0.008    | up | 2.03 | Sorbs2                    | BC039163          | sorbin and SH3 domain containing 2                                                                                                   |
| 10596200 | 7.42  | 6.40  | 2.31E-04 | up | 2.03 | Tmem108                   | BC052085          | transmembrane protein 108                                                                                                            |
| 10607738 | 8.20  | 7.16  | 0.01279  | up | 2.05 | Car5b                     | BC034413          | carbonic anhydrase 5b, mitochondrial                                                                                                 |
| 10436978 | 10.60 | 9.56  | 0.0041   | up | 2.06 | Cbr3                      | BC028763          | carbonyl reductase 3                                                                                                                 |
| 10603151 | 9.71  | 8.67  | 0.00536  | up | 2.06 | Gpm6b                     | AF254875          | glycoprotein m6b                                                                                                                     |
| 10435961 | 8.23  | 7.18  | 0.0049   | up | 2.07 | Gm10808                   | AK136967          |                                                                                                                                      |
| 10423654 | 8.13  | 7.07  | 0.00376  | up | 2.08 | Osr2                      | AF370121          | odd-skipped related 2 (Drosophila)                                                                                                   |
| 10581664 | 8.35  | 7.27  | 5.13E-04 | up | 2.10 | Il34                      | BC016254          | RIKEN cDNA 2010004A03 gene                                                                                                           |
| 10572130 | 8.71  | 7.63  | 0.00109  | up | 2.11 | Lpl                       | BC003305          | lipoprotein lipase                                                                                                                   |
| 10586118 | 8.98  | 7.91  | 0.00128  | up | 2.11 | Calml4                    | AY061807          | calmodulin-like 4                                                                                                                    |
| 10374777 | 11.75 | 10.66 | 0.00364  | up | 2.12 | Efemp1                    | AY251056          | epidermal growth factor-containing fibulin-like extracellular matrix protein 1                                                       |
| 10409314 | 10.00 | 8.92  | 5.08E-04 | up | 2.13 | Msx2                      | AK133846          | homeobox, msh-like 2   similar to homeobox protein                                                                                   |
| 10440099 | 10.15 | 9.06  | 0.00677  | up | 2.13 | St3gal6                   | AF119390          | ST3 beta-galactoside alpha-2,3-sialyltransferase 6                                                                                   |
| 10445325 | 9.88  | 8.79  | 0.00259  | up | 2.13 | Rcan2                     | BC049096          | regulator of calcineurin 2                                                                                                           |
| 10384223 | 10.69 | 9.59  | 0.00161  | up | 2.14 | Igfbp3                    | BC058261          | insulin-like growth factor binding protein 3                                                                                         |
| 10561128 | 7.28  | 6.18  | 0.00442  | up | 2.14 | Cyp2s1                    | BC064733          | cytochrome P450, family 2, subfamily s, polypeptide 1                                                                                |
| 10475532 | 10.87 | 9.77  | 0.00208  | up | 2.15 | Sqrdl                     | AF174535          | sulfide quinone reductase-like (yeast)                                                                                               |
| 10503241 | 9.50  | 8.39  | 0.0092   | up | 2.17 | Gdf6                      | AJ537425          | growth differentiation factor 6                                                                                                      |
| 10416057 | 9.57  | 8.45  | 9.57E-04 | up | 2.17 | Clu                       | D14077            | clusterin                                                                                                                            |
| 10594044 | 8.92  | 7.79  | 0.00509  | up | 2.18 | Islr                      | BC006602          | immunoglobulin superfamily containing leucine-rich repeat                                                                            |
| 10542470 | 10.55 | 9.41  | 0.00283  | up | 2.19 | Mgst1                     | BC009155          | microsomal glutathione S-transferase 1                                                                                               |
| 10531931 | 9.08  | 7.94  | 0.00153  | up | 2.20 | Sparcl1                   | U77330            | SPARC-like 1 (mast9, hev1n)                                                                                                          |
| 10404422 | 9.46  | 8.31  | 1.44E-05 | up | 2.21 | Serpib6b                  | U96707            | serine (or cysteine) peptidase inhibitor, clade B, member 6b                                                                         |

|          |       |       |          |    |      |                         |                        |                                                                                                                         |
|----------|-------|-------|----------|----|------|-------------------------|------------------------|-------------------------------------------------------------------------------------------------------------------------|
| 10496425 | 10.14 | 9.00  | 7.94E-05 | up | 2.21 | Adh7                    | AF331802               | alcohol dehydrogenase 7 (class IV), mu or sigma polypeptide                                                             |
| 10478048 | 7.47  | 6.32  | 0.01285  | up | 2.22 | Lbp                     | BC004795               | lipopolysaccharide binding protein                                                                                      |
| 10469066 | 7.62  | 6.46  | 0.00602  | up | 2.22 | Ccdc3                   | BC058616               | coiled-coil domain containing 3                                                                                         |
| 10542066 | 8.26  | 7.11  | 9.96E-04 | up | 2.23 | Tspan11                 | BC057639               | tetraspanin 11                                                                                                          |
| 10463476 | 10.02 | 8.85  | 2.15E-04 | up | 2.24 | Kazald1                 | BC115642               | Kazal-type serine peptidase inhibitor domain 1                                                                          |
| 10366476 | 8.84  | 7.67  | 8.87E-04 | up | 2.26 | Ptprb                   | AY077755               | protein tyrosine phosphatase, receptor type, B                                                                          |
| 10380250 | 8.18  | 6.99  | 0.00402  | up | 2.29 | NR_003492               | AL646096               | RIKEN cDNA 2210409E12 gene                                                                                              |
| 10516490 | 9.49  | 8.28  | 0.0031   | up | 2.30 | Gjb5                    | M91236                 | gap junction protein, beta 5                                                                                            |
| 10349947 | 11.51 | 10.30 | 0.00786  | up | 2.32 | Fmod                    | BC064779               | fibromodulin                                                                                                            |
| 10418300 | 8.41  | 7.19  | 0.01496  | up | 2.33 | Cacna2d3                | BC148700               | calcium channel, voltage-dependent, alpha2/delta subunit 3                                                              |
| 10521824 | 8.27  | 7.04  | 0.00676  | up | 2.35 | Sod3                    | U38261                 | superoxide dismutase 3, extracellular                                                                                   |
| 10593418 | 9.62  | 8.37  | 3.09E-04 | up | 2.38 | Hspb2                   | BC064051               | heat shock protein 2                                                                                                    |
| 10544891 | 7.68  | 6.42  | 0.00952  | up | 2.39 | Nod1                    | BC042670               | nucleotide-binding oligomerization domain containing 1                                                                  |
| 10352905 | 8.07  | 6.81  | 0.00178  | up | 2.39 | Cd34                    | BC006607               | CD34 antigen                                                                                                            |
| 10584883 | 10.26 | 8.99  | 0.00149  | up | 2.43 | Fxyd6                   | BC051127               | FXD domain-containing ion transport regulator 6                                                                         |
| 10399555 | 7.76  | 6.47  | 0.00448  | up | 2.45 | Kcnf1                   | BC053089               | potassium voltage-gated channel, subfamily F, member 1                                                                  |
| 10506883 | 9.07  | 7.77  | 0.00512  | up | 2.46 | Rab3b                   | BC051918               | RAB3B, member RAS oncogene family                                                                                       |
| 10453394 | 8.89  | 7.58  | 0.00447  | up | 2.46 | Six2                    | BC068021               | sine oculis-related homeobox 2 homolog (Drosophila)   similar to Homeobox protein SIX2 (Sine oculis homeobox homolog 2) |
| 10414065 | 11.85 | 10.54 | 0.00979  | up | 2.49 | Anxa8                   | BC030407               | annexin A8                                                                                                              |
| 10574572 | 7.34  | 5.99  | 6.52E-04 | up | 2.55 | 2210023G05Rik           | BC027185 BC024548      | RIKEN cDNA 2210023G05 gene                                                                                              |
| 10566034 | 9.52  | 8.17  | 3.86E-04 | up | 2.56 | Folr1                   | AF096319               | folate receptor 1 (adult)                                                                                               |
| 10575844 | 9.46  | 8.07  | 0.00438  | up | 2.62 | Cdh13                   | BC021628               | cadherin 13                                                                                                             |
| 10511363 | 8.74  | 7.35  | 0.00745  | up | 2.62 | Penk1                   | M55181                 | preproenkephalin 1                                                                                                      |
| 10361887 | 11.73 | 10.33 | 0.00341  | up | 2.63 | Perp                    | AF249870               | PERP, TP53 apoptosis effector                                                                                           |
| 10413609 | 10.95 | 9.54  | 1.94E-04 | up | 2.65 | Mustn1                  | BC116939 AJ277212      | musculoskeletal, embryonic nuclear protein 1                                                                            |
| 10575693 | 7.81  | 6.39  | 0.00221  | up | 2.67 | Vat1l                   | BC056927               |                                                                                                                         |
| 10547740 | 7.99  | 6.57  | 5.61E-04 | up | 2.67 | C1s                     | BC018319               | complement component 1, s subcomponent serine (or cysteine) peptidase inhibitor, clade G, member 1                      |
| 10484463 | 10.36 | 8.94  | 1.54E-04 | up | 2.68 | Serpinc1                | AF010254               |                                                                                                                         |
| 10362959 | 8.46  | 7.04  | 0.01227  | up | 2.68 | Popdc3                  | BC114993               | popeye domain containing 3                                                                                              |
| 10591169 | 7.81  | 6.37  | 0.00989  | up | 2.71 | Muc16 LOC385009         | AK003577               | mucin 16                                                                                                                |
| 10393936 | 9.52  | 8.05  | 0.00301  | up | 2.77 | Cbr2                    | BC010758               | carbonyl reductase 2                                                                                                    |
| 10585194 | 9.28  | 7.79  | 0.00111  | up | 2.81 | Il18                    | D49949                 | interleukin 18                                                                                                          |
| 10439500 | 12.34 | 10.83 | 0.01017  | up | 2.84 | Upk1b                   | BC046604               | uroplakin 1B                                                                                                            |
| 10404982 | 9.20  | 7.67  | 0.00113  | up | 2.90 | Barx1                   | BC119047               | BarH-like homeobox 1                                                                                                    |
| 10372145 | 10.06 | 8.52  | 8.85E-05 | up | 2.91 | Alx1                    | BC052200               | ALX homeobox 1                                                                                                          |
| 10540897 | 9.74  | 8.20  | 0.0035   | up | 2.92 | Pparg                   | U01841                 | peroxisome proliferator activated receptor gamma                                                                        |
| 10485955 | 9.80  | 8.24  | 0.01529  | up | 2.93 | Scg5                    | BC029021               | secretogranin V                                                                                                         |
| 10357870 | 10.31 | 8.75  | 0.00863  | up | 2.96 | Prepl                   | BC019775               | proline arginine-rich end leucine-rich repeat                                                                           |
| 10427052 | 9.87  | 8.26  | 0.01108  | up | 3.05 | Krt7                    | BC010337               | keratin 7                                                                                                               |
| 10472809 | 9.02  | 7.41  | 0.00106  | up | 3.05 | Dlx1                    | U51001                 | distal-less homeobox 1                                                                                                  |
| 10419566 | 8.98  | 7.34  | 0.00652  | up | 3.12 | Ang2                    | BC146501               | angiogenin, ribonuclease A family, member 2                                                                             |
| 10345065 | 8.68  | 7.02  | 0.00143  | up | 3.17 | Gsta3                   | M73483                 | glutathione S-transferase, alpha 3                                                                                      |
| 10565204 | 8.67  | 6.96  | 0.00139  | up | 3.25 | Bnc1                    | U88064                 | basonuclin 1                                                                                                            |
| 10426767 | 9.91  | 8.16  | 1.06E-04 | up | 3.38 | Aqp5                    | AF087654               | aquaporin 5                                                                                                             |
| 10347277 | 12.92 | 11.13 | 9.50E-04 | up | 3.46 | Igfbp2                  | BC012724               | insulin-like growth factor binding protein 2                                                                            |
| 10424662 | 8.07  | 6.21  | 0.00225  | up | 3.63 | Psca                    | AF319173               | prostate stem cell antigen                                                                                              |
| 10345921 | 10.64 | 8.77  | 0.00332  | up | 3.66 | 1500015O10Rik           | BC002254               | RIKEN cDNA 1500015O10 gene                                                                                              |
| 10414025 | 8.86  | 6.95  | 0.01032  | up | 3.76 | Gdf10                   | BC058358               | growth differentiation factor 10                                                                                        |
| 10381096 | 11.01 | 9.03  | 5.89E-05 | up | 3.92 | Igfbp4                  | BC019836               | insulin-like growth factor binding protein 4                                                                            |
| 10498584 | 9.62  | 7.64  | 0.00104  | up | 3.95 | Rarres1                 | AK077393               | retinoic acid receptor responder (tazarotene induced) 1                                                                 |
| 10538459 | 10.10 | 8.07  | 1.88E-04 | up | 4.07 | Aqp1                    | L02914                 | aquaporin 1                                                                                                             |
| 10502961 | 9.30  | 7.13  | 1.62E-06 | up | 4.51 | Lhx8                    | BC125281               | LIM homeobox protein 8                                                                                                  |
| 10395389 | 7.95  | 5.77  | 0.0052   | up | 4.53 | Sostdc1                 | AY255635               | sclerostin domain containing 1                                                                                          |
| 10380248 | 8.75  | 6.54  | 0.00295  | up | 4.62 | 300000001305 OTTMUSG000 | BC099439               |                                                                                                                         |
| 10461979 | 10.90 | 8.68  | 0.00291  | up | 4.66 | Aldh1a1                 | BC054386               | aldehyde dehydrogenase family 1, subfamily A1                                                                           |
| 10449000 | 10.07 | 7.81  | 1.58E-04 | up | 4.78 | Msln                    | BC023753               | mesothelin                                                                                                              |
| 10362495 | 10.51 | 8.24  | 0.00759  | up | 4.80 | Col10a1                 | BC156192               | collagen, type X, alpha 1                                                                                               |
| 10571815 | 9.73  | 7.47  | 0.00702  | up | 4.81 | Gpm6a                   | BC029711               | glycoprotein m6a                                                                                                        |
| 10526441 | 10.19 | 7.91  | 3.67E-05 | up | 4.83 | Upk3b                   | AY233463               | uroplakin 3B                                                                                                            |
| 10354229 | 9.38  | 7.09  | 0.00295  | up | 4.89 | 2610017I09Rik           | 058417 BC049671 BC0945 | RIKEN cDNA 2610017I09 gene                                                                                              |
| 10366446 | 9.59  | 7.07  | 0.01159  | up | 5.74 | Tspan8                  | BC029808               | tetraspanin 8                                                                                                           |
| 10345016 | 9.08  | 6.46  | 4.94E-04 | up | 6.13 | Tcfap2b                 | AK017373               | transcription factor AP-2 beta                                                                                          |
| 10489463 | 9.97  | 7.26  | 0.00117  | up | 6.52 | Slpi                    | U73004                 | secretory leukocyte peptidase inhibitor                                                                                 |
| 10529651 | 8.65  | 5.59  | 0.00312  | up | 8.35 | Msx1                    | BC016426               | homeobox, msh-like 1                                                                                                    |
