# Supplementary material for: Alkbh8 Regulates Selenocysteine-Protein Expression to Protect against Reactive Oxygen Species Damage
Source: PubMed Central journal article supplement (PMC4492958; doi:10.1371/journal.pone.0131335), 2015-07-06

Supplemental Figure 4

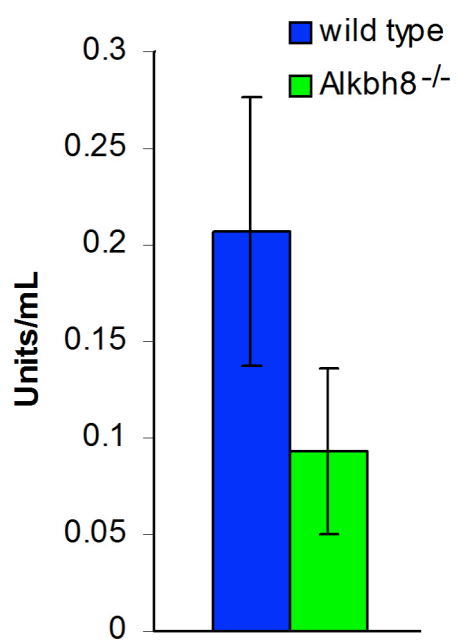

Supplement: pone.0131335.s005.pdf [file pone.0131335.s005.pdf]
